# Supplementary material for: Comparing and synthesizing quantitative distribution models and qualitative vulnerability assessments to project marine species distributions under climate change
Source: PLoS One. 2020 Apr 16;15(4):e0231595. doi: 10.1371/journal.pone.0231595 (PMC7161985; doi:10.1371/journal.pone.0231595)
Supplement: S1 Table — The full list of species evaluated in the qualitative expert vulnerability assessment completed by Hare et al. (2016), their functional group, and corresponding SDM validation statistics, with SDMs built using data from 1982–2011 and then validated using data from 2011–2015. To be included in our analysis indicating the species distribution model had to have at least “good” predictive ability (AUC > = 0.7) in both seasons when evaluated against the hold out 2011–2015 testing data. (XLSX) [file pone.0231595.s001.xlsx]

## Sheet: S1 Table
Species Common Name	Species Scientific Name	Functional Group	Species Distribution Model AUC >= 0.7 in both seasons??	Fall DevianceExplained PresenceModel	Fall DevianceExplained LogBiomassModel	Fall AUC PresenceModel	Fall PredVsObs CorrelationCoeff PresenceModel	Fall PredVsObs CorrelationCoeff Biomass	Fall RootMeanSquareError PresenceModel	Fall RootMeanSquareError Biomass	Spring DevianceExplained PresenceModel	Spring DevianceExplained LogBiomassModel	Spring AUC PresenceModel	Spring PredVsObs CorrelationCoeff PresenceModel	Spring PredVsObs CorrelationCoeff Biomass	Spring RootMeanSquareError PresenceModel	Spring RootMeanSquareError Biomass
Atlantic Croaker	Micropogonias undulates	Coastal	Yes	0.64	0.311	0.979	0.795	0.412	0.633	1.004	0.533	0.098	0.783	0.377	0.079	0.943	1
Atlantic Menhaden	Brevoortia tyrannus	Coastal	Yes	0.317	0.029	0.934	0.311	0.277	0.978	0.989	0.378	0.04	0.961	0.318	0.088	0.948	0.998
Black Sea Bass	Centropristis striata	Coastal	Yes	0.292	0.1	0.925	0.697	0.302	0.83	0.958	0.443	0.141	0.842	0.498	0.233	0.874	0.981
Northern Kingfish	Menticirrhus saxatillis	Coastal	Yes	0.396	0.103	0.95	0.556	0.384	0.894	0.965	0.274	0.009	0.82	0.328	0.304	0.997	0.997
Red Drum	Sciaenops ocellatus	Coastal	No	NA	NA	NA	NA	NA	NA	NA	NA	NA	NA	NA	NA	NA	NA
Scup	Stenotomus chrysops	Coastal	Yes	0.521	0.336	0.931	0.72	0.206	0.698	0.997	0.431	0.079	0.904	0.535	0.1	0.848	1
Spanish Mackerel	Scomberomorous maculatus	Coastal	No	NA	NA	NA	NA	NA	NA	NA	NA	NA	NA	NA	NA	NA	NA
Spot	Leiostomus xanthurus	Coastal	Yes	0.656	0.36	0.971	0.715	0.222	0.701	0.999	0.566	0.098	0.825	0.606	0.034	0.893	1
Spotted Seatrout	Cynoscion nebulosus	Coastal	No	NA	NA	NA	NA	NA	NA	NA	NA	NA	NA	NA	NA	NA	NA
Striped Bass	Morone saxatillis	Coastal	Yes	0.3	0.035	0.924	0.083	0.078	1.008	1	0.402	0.167	0.95	0.361	0.043	0.932	1
Summer Flounder	Paralichthys dentatus	Coastal	Yes	0.522	0.375	0.934	0.717	0.31	0.713	0.967	0.355	0.246	0.87	0.622	0.411	0.8	0.933
Tautog	Tautoga onitis	Coastal	Yes	0.284	0.024	0.957	0.254	0.164	0.98	0.99	0.161	0.005	0.871	0.071	0.049	0.997	0.999
Weakfish	Cynoscion regalis	Coastal	Yes	0.611	0.437	0.952	0.608	0.256	0.794	0.982	0.387	0.168	0.836	0.235	0.051	0.973	1.003
Winter Flounder	Psuedopleuronectes americanus	Coastal	Yes	0.417	0.286	0.916	0.662	0.352	0.797	0.989	0.447	0.262	0.911	0.675	0.319	0.771	0.965
Alewife	Alosa psuedoharengus	Diadromous	Yes	0.285	0.081	0.938	0.646	0.247	1.004	1.012	0.091	0.058	0.769	0.475	0.163	0.895	1.002
American Eel	Anguilla rostrata	Diadromous	No	NA	NA	NA	NA	NA	NA	NA	NA	NA	NA	NA	NA	NA	NA
American Shad	Alosa sapidissima	Diadromous	Yes	0.102	0.023	0.765	0.3	0.072	1.013	1.005	0.032	0.014	0.725	0.334	0.138	0.98	0.992
Atlantic Salmon	Salmo salar	Diadromous	No	NA	NA	NA	NA	NA	NA	NA	NA	NA	NA	NA	NA	NA	NA
Atlantic Sturgeon	Acipenser oxyrhynchus	Diadromous	No	NA	NA	NA	NA	NA	NA	NA	NA	NA	NA	NA	NA	NA	NA
Blueback Herring	Alosa aestivalis	Diadromous	No	NA	NA	NA	NA	NA	NA	NA	NA	NA	NA	NA	NA	NA	NA
Conger Eel	Anguilla oceanica	Diadromous	No	NA	NA	NA	NA	NA	NA	NA	NA	NA	NA	NA	NA	NA	NA
Hickory Shad	Alosa mediocris	Diadromous	No	NA	NA	NA	NA	NA	NA	NA	NA	NA	NA	NA	NA	NA	NA
Rainbow Smelt	Osmerus mordax	Diadromous	No	NA	NA	NA	NA	NA	NA	NA	NA	NA	NA	NA	NA	NA	NA
Shortnose Sturgeon	Acipenser brevirostrum	Diadromous	No	NA	NA	NA	NA	NA	NA	NA	NA	NA	NA	NA	NA	NA	NA
Barndoor Skate	Dipturus laevis	Elasmobranch	Yes	0.205	0.052	0.824	0.466	0.202	1.05	1.008	0.188	0.044	0.797	0.44	0.182	1.064	1.009
Clearnose Skate	Raja eglanteria	Elasmobranch	Yes	0.46	0.218	0.976	0.83	0.426	0.692	0.955	0.522	0.328	0.937	0.63	0.529	0.785	0.901
Dusky Shark	Carcharhinus obscurus	Elasmobranch	No	NA	NA	NA	NA	NA	NA	NA	NA	NA	NA	NA	NA	NA	NA
Little Skate	Leucoraja erinacea	Elasmobranch	Yes	0.317	0.284	0.884	0.668	0.377	0.812	0.955	0.318	0.318	0.876	0.663	0.341	0.797	1.001
Porbeagle Shark	Lamna nasus	Elasmobranch	No	NA	NA	NA	NA	NA	NA	NA	NA	NA	NA	NA	NA	NA	NA
Rosette Skate	Leucoraja garmani	Elasmobranch	Yes	0.447	0.096	0.942	0.642	0.461	0.81	0.945	0.451	0.06	0.954	0.666	0.263	0.84	0.987
Sand Tiger	Carcharias taurus	Elasmobranch	No	NA	NA	NA	NA	NA	NA	NA	NA	NA	NA	NA	NA	NA	NA
Smooth Dogfish	Mustelus canis	Elasmobranch	Yes	0.444	0.307	0.918	0.605	0.276	0.796	0.99	0.536	0.279	0.965	0.661	0.489	0.769	1.001
Smooth Skate	Malacoraja senta	Elasmobranch	Yes	0.393	0.135	0.95	0.688	0.29	0.885	0.963	0.365	0.11	0.887	0.668	0.397	0.923	0.93
Spiny Dogfish	Squalus acanthias	Elasmobranch	Yes	0.236	0.249	0.81	0.525	0.169	0.899	1.012	0.189	0.266	0.828	0.561	0.322	0.836	1.011
Thorny Skate	Amblyraja radiata	Elasmobranch	Yes	0.389	0.187	0.889	0.439	0.177	0.918	1.008	0.338	0.143	0.835	0.428	0.268	0.917	0.967
Winter Skate	Leucoraja ocellata	Elasmobranch	Yes	0.39	0.365	0.873	0.547	0.174	0.877	1.002	0.182	0.187	0.742	0.393	0.131	1.031	1.019
Acadian Redfish	Sebastes fasciatus	Groundfish	Yes	0.591	0.34	0.975	0.7	0.32	0.812	1.01	0.454	0.205	0.91	0.664	0.314	0.825	1.011
American Plaice	Hippoglossoides platessoides	Groundfish	Yes	0.556	0.321	0.964	0.746	0.338	0.749	0.977	0.473	0.255	0.883	0.588	0.214	0.853	0.984
Atlantic Cod	Gadus morhua	Groundfish	Yes	0.412	0.25	0.895	0.446	0.064	0.91	1.004	0.335	0.221	0.804	0.447	0.083	0.903	1
Atlantic Hagfish	Myxine glutinosa	Groundfish	Yes	0.294	0.044	0.841	0.283	0.157	0.969	1.079	0.193	0.009	0.856	0.35	0.233	0.997	0.972
Atlantic Halibut	Hippoglossus hippoglassus	Groundfish	Yes	0.342	0.081	0.918	0.357	0.15	0.987	1.003	0.359	0.064	0.817	0.248	0.093	0.981	1.001
Atlantic Wolffish	Anarhichas lupus	Groundfish	Yes	0.276	0.036	0.863	0.046	0.014	1.021	1.005	0.22	0.038	0.785	0.173	0.055	0.99	0.999
Cusk	Brosme brosme	Groundfish	Yes	0.317	0.075	0.864	0.093	0.081	1.017	0.998	0.344	0.086	0.81	0.177	0.149	1.011	0.99
Haddock	Melanogrammus aeglefinus	Groundfish	Yes	0.314	0.207	0.908	0.621	0.082	0.967	1.019	0.345	0.183	0.905	0.639	0.18	0.924	1.009
Monkfish (Goosefish)	Lophius americanus	Groundfish	No	NA	NA	NA	NA	NA	NA	NA	NA	NA	NA	NA	NA	NA	NA
Ocean Pout	Zoarces americanus	Groundfish	Yes	0.204	0.083	0.807	0.386	0.113	0.976	0.999	0.236	0.196	0.758	0.417	0.154	0.921	1.253
Offshore Hake	Merluccius albidus	Groundfish	Yes	0.582	0.189	0.986	0.802	0.536	0.663	0.898	0.572	0.173	0.978	0.681	0.409	0.734	0.948
Pollock	Pollachius virens	Groundfish	Yes	0.309	0.113	0.88	0.33	0.079	0.965	1.003	0.28	0.138	0.815	0.371	0.086	0.93	1.001
Red Hake	Urophycis chuss	Groundfish	Yes	0.282	0.247	0.879	0.64	0.361	0.88	0.987	0.227	0.319	0.807	0.496	0.29	1.005	0.97
Silver Hake	Merluccius bilinearis	Groundfish	Yes	0.35	0.378	0.871	0.585	0.488	0.923	1.015	0.269	0.332	0.811	0.373	0.422	1.258	1
Tilefish	Lopholatilus chamaeleonticeps	Groundfish	Yes	0.375	0.011	0.937	0.185	0.129	0.988	0.994	0.371	0.014	0.747	0.086	0.002	1.004	1.005
White Hake	Urophycis tenuis	Groundfish	Yes	0.519	0.544	0.955	0.762	0.532	0.723	0.923	0.475	0.416	0.929	0.731	0.643	0.702	0.862
Windowpane Flounder	Scophthalmus aquosus	Groundfish	No	NA	NA	NA	NA	NA	NA	NA	NA	NA	NA	NA	NA	NA	NA
Witch Flounder	Clyptocephalus cynoglossus	Groundfish	Yes	0.378	0.224	0.913	0.645	0.279	0.872	0.962	0.344	0.256	0.872	0.618	0.328	0.88	0.973
Yellowtail Flounder	Limanda ferruginea	Groundfish	Yes	0.36	0.198	0.916	0.652	0.32	0.794	0.982	0.357	0.206	0.868	0.631	0.241	0.796	0.991
American Lobster	Homarus americanus	Invertebrates	Yes	0.124	0.172	0.73	0.4	0.39	0.983	1.028	0.135	0.153	0.813	0.52	0.332	0.952	1.034
Atlantic rock crab	Cancer irroratus	Invertebrates	Yes	0.115	0.038	0.746	0.399	0.04	1.022	1.079	0.189	0.072	0.84	0.558	0.198	0.992	1.321
Atlantic Surfclam	Spisula solidissima	Invertebrates	No	NA	NA	NA	NA	NA	NA	NA	NA	NA	NA	NA	NA	NA	NA
Bay Scallop	Argopecten irradians	Invertebrates	No	NA	NA	NA	NA	NA	NA	NA	NA	NA	NA	NA	NA	NA	NA
Bloodworm	Glycera dibranchiata	Invertebrates	No	NA	NA	NA	NA	NA	NA	NA	NA	NA	NA	NA	NA	NA	NA
Blue Crab	Callinectes sapidus	Invertebrates	No	NA	NA	NA	NA	NA	NA	NA	NA	NA	NA	NA	NA	NA	NA
Blue Mussel	Mytilus edulis	Invertebrates	No	NA	NA	NA	NA	NA	NA	NA	NA	NA	NA	NA	NA	NA	NA
Channeled Whelk	Busycotypus canaliculatus	Invertebrates	No	NA	NA	NA	NA	NA	NA	NA	NA	NA	NA	NA	NA	NA	NA
Eastern Oyster	Crassostrea virginica	Invertebrates	No	NA	NA	NA	NA	NA	NA	NA	NA	NA	NA	NA	NA	NA	NA
Green Sea Urchin	Strongylocentrotus droebachiensis	Invertebrates	No	NA	NA	NA	NA	NA	NA	NA	NA	NA	NA	NA	NA	NA	NA
Horseshoe Crab	Lumulus polyphemus	Invertebrates	Yes	0.409	0.192	0.894	0.499	0.418	0.91	1.001	0.31	0.097	0.877	0.458	0.2	0.95	1.006
Jonah crab	Cancer borealis	Invertebrates	No	NA	NA	NA	NA	NA	NA	NA	NA	NA	NA	NA	NA	NA	NA
Knobbed Whelk	Busycon carica	Invertebrates	No	NA	NA	NA	NA	NA	NA	NA	NA	NA	NA	NA	NA	NA	NA
Northern Quahog	Mercenaria mercenaria	Invertebrates	No	NA	NA	NA	NA	NA	NA	NA	NA	NA	NA	NA	NA	NA	NA
Northern Shrimp	Pandalus borealis	Invertebrates	No	NA	NA	NA	NA	NA	NA	NA	NA	NA	NA	NA	NA	NA	NA
Ocean Quahog	Arctica islandica	Invertebrates	No	NA	NA	NA	NA	NA	NA	NA	NA	NA	NA	NA	NA	NA	NA
Red deepsea crab	Chaceon quinquedens	Invertebrates	Yes	0.286	0.069	0.836	0.172	0.224	0.99	0.977	0.259	0.033	0.843	0.231	0.216	0.979	0.991
Sea Scallop	Placopecten magellanicus	Invertebrates	Yes	0.301	0.199	0.849	0.579	0.228	0.902	1.004	0.277	0.161	0.799	0.475	0.166	0.951	0.999
Softshell Clam	Mya arenaria	Invertebrates	No	NA	NA	NA	NA	NA	NA	NA	NA	NA	NA	NA	NA	NA	NA
American sand lance	Ammodytes americanus	Pelagic	No	NA	NA	NA	NA	NA	NA	NA	NA	NA	NA	NA	NA	NA	NA
Anchovies	Anchoa hepsetus/Anchoa mitchilli	Pelagic	No	NA	NA	NA	NA	NA	NA	NA	NA	NA	NA	NA	NA	NA	NA
Atlantic Herring	Clupea harengus	Pelagic	Yes	0.419	0.208	0.949	0.701	0.15	0.862	1.01	0.083	0.098	0.738	0.441	0.157	1.007	1.007
Atlantic Mackerel	Scomber scombrus	Pelagic	No	NA	NA	NA	NA	NA	NA	NA	NA	NA	NA	NA	NA	NA	NA
Atlantic Saury	Scomberesox saurus	Pelagic	No	NA	NA	NA	NA	NA	NA	NA	NA	NA	NA	NA	NA	NA	NA
Bluefish	Pomatomus saltatrix	Pelagic	Yes	0.376	0.205	0.892	0.529	0.154	0.85	0.994	0.413	0.069	0.943	0.337	0.213	0.944	0.995
Butterfish	Peprilus triacanthus	Pelagic	No	NA	NA	NA	NA	NA	NA	NA	NA	NA	NA	NA	NA	NA	NA
Longfin Squid	Doryteuthis pealeii	Pelagic	Yes	0.435	0.292	0.941	0.729	0.286	0.701	1.026	0.555	0.439	0.865	0.64	0.469	0.802	0.915
Northern sand lance	Ammodytes dubius	Pelagic	Yes	0.19	0.016	0.751	0.08	0.016	1.04	1.005	0.223	0.046	0.818	0.265	0.158	1.024	0.995
Northern Shortfin Squid	Illex illecebrosus	Pelagic	Yes	0.303	0.19	0.834	0.627	0.213	0.793	0.979	0.395	0.094	0.892	0.662	0.259	0.78	0.974
